# Supplementary material for: Antiproliferative Effect of Lapatinib in HER2-Positive and HER2-Negative/HER3-High Breast Cancer: Results of the Presurgical Randomized MAPLE Trial (CRUK E/06/039)
Source: Oxford University Press journal article supplement (doi:10.1158/1078-0432.ccr-14-1428), 2014-11-15
Supplement: 10780432ccr141428-sup-131084_1_supp_2671887_nccl09.docx [file 10780432ccr141428-sup-131084_1_supp_2671887_nccl09.docx]

**Supplementary Table 1**

| **Worst toxicities (NCI CTC v.03)** | **Lapatinib (%)**  **N=94** | **Placebo (%)**  **N=27** | **P value** |
| --- | --- | --- | --- |
| Fatigue  Grade 1/2 | 41% | 28% | NS |
| Rash  Grade 1/2  Grade 3 | 64%  6% | 12%  0% | p=0.001 |
| Nausea  Grade 1 | 21% | 17% | NS |
| Mucositis  Grade 1/2 | 15% | 4% | NS |
| Diarrhoea  Grade 1/2 | 56% | 8% | p=0.001 |
| Infection  Grade 1/2  Grade 3 | 6%  1% | 20%  0% | NS |
